# Supplementary material for: Dissolution Rate of Nanomaterials Determined by Ions and Particle Size under Lysosomal Conditions: Contributions to Standardization of Simulant Fluids and Analytical Methods
Source: PubMed Central journal article supplement — Chem Res Toxicol. 2022 May 20;35(6):963–80. doi: 10.1021/acs.chemrestox.1c00418 (PMC9215348; doi:10.1021/acs.chemrestox.1c00418), 2022-05-20
Supplement: tx1c00418_si_001.pdf [file tx1c00418_si_001.pdf]

# On the dissolution rate on nanomaterials determined by ions and by particle size under lysosomal conditions: contributions to standardisation of simulant fluids and analytical methods.

Ilaria Zanoni<sup>L</sup>, Johannes G. Keller<sup>†‡</sup>, Ursula G. Sauer<sup>↓</sup>, Philipp Müllert, Lan Ma-Hock<sup>‡</sup>, Keld A. Jensen<sup>†</sup>, Anna Luisa Costa<sup>L</sup>, Wendel Wohlleben<sup>†‡\*</sup>

<sup>†</sup> BASF SE, Dept. of Material Physics and Analytics, 67056 Ludwigshafen, Germany

<sup>L</sup> CNR-ISTEC-National Research Council of Italy, Institute of Science and Technology for Ceramics, 48018, Faenza, Italy

<sup>↓</sup> Scientific Consultancy - Animal Welfare, 85579 Neubiberg, Germany

<sup>†</sup> National Research Centre for Work Environment (NRCWE), 2100 Copenhagen, Denmark

<sup>‡</sup> BASF SE, Dept. of Experimental Toxicology and Ecology, 67056 Ludwigshafen, Germany

\* Corresponding author: [wendel.wohlleben@basf.com](mailto:wendel.wohlleben@basf.com);

BASF SE, Carl-Bosch-Strasse, Building B7, 67056 Ludwigshafen, Germany

## Supporting Information

Details on the literature review, simulant media composition and TEM images of SiO<sub>2</sub> and CeO<sub>2</sub>.

### **Details on the literature review:**

The following queries were conducted in December 2018 and January 2019 in the US National Institutes of Health National Library of Medicine database PubMed <sup>1</sup> to search for literature informing on the specific composition of macrophage lysosomes:

1. *\*lysosom\* (morpholog\* OR compos\*) macrophage* = 944 retrievals on 18 January 2019.

To reduce the total number of retrievals, the following restriction was applied:

2. *\*lysosom\* (morpholog\* OR compos\*) macrophage (alveol\* OR lung OR pulmonary)* = 142 retrievals on 18 January 2019;
3. *\*lysosom\* (morpholog\* OR compos\*) macrophage[ti]* = 69 retrievals on 18 January 2019;
4. *\*lysosom\*[ti] (morpholog\* OR compos\*) macrophage* = 103 retrievals on 18 January 2019.

All titles and abstracts retrieved via search queries 2-4 were evaluated for potential relevance of the publication to inform on macrophage lysosome composition. Potentially relevant publications were evaluated in full text. Additionally, the references in these publications (and in the publications addressing MMVF or nanomaterial dissolution rate of) were checked for potential relevance.

**Table SI\_1:** Composition of pH 4.5 extraction fluids reported in the literature (g/L; unless otherwise noted), reproduced from Sauer et al. (2021)<sup>2</sup>. (Reproduced from Sauer, U. G.; Werle, K.; Waindok, H.; Hirth, S.; Hachmöller, O.; Wohlleben, W. Critical Choices in Predicting Stone Wool Biodurability: Lysosomal Fluid Compositions and Binder Effects. Chem. Res. Toxicol. 2021. Copyright 2021 American Chemical Society.)

|                                                        | Christensen et al. (1994) | Thélohan & de Meringo | Guldberg et al. (1998) |             |                   |                 |             | Muhle et al. (1998) | Stopford et al. (2003) | Stefaniak et al. (2005) |       | Midander et al. (2007) | Shinohara et al. (2017) |
|--------------------------------------------------------|---------------------------|-----------------------|------------------------|-------------|-------------------|-----------------|-------------|---------------------|------------------------|-------------------------|-------|------------------------|-------------------------|
|                                                        |                           |                       | A: MK (HCl)            | B: MG (HCl) | C: MK (phthalate) | D: MG (citrate) | E: MG (HCl) |                     |                        | "PSF"                   | B&A   |                        |                         |
| MgCl <sub>2</sub> * 6 H <sub>2</sub> O                 | 0.212                     | 0.106                 |                        | 0.212       |                   | 0.106           | 0.160       | 0.106               | 0.106                  |                         | 4.615 |                        | 0.142                   |
| MgCl <sub>2</sub>                                      |                           |                       |                        |             |                   |                 |             |                     |                        |                         |       | 0.0497                 |                         |
| NaCl                                                   | 7.120                     | 3.210                 | 6.780                  | 7.120       | 6.650             | 3.208           | 6.171       | 3.208               | 3.210                  | 6.650                   | 2.01  | 3.210                  | 4.200                   |
| NaOH                                                   |                           | 6                     |                        |             |                   | 1.888           |             |                     | 6                      |                         |       | 6.000                  | 8.000                   |
| KCl                                                    |                           |                       |                        |             |                   |                 | 0.031       |                     |                        |                         | 8.700 |                        |                         |
| CaCl <sub>2</sub>                                      | -                         | 0.097                 | 0.022                  |             |                   |                 |             |                     |                        |                         |       |                        | 0.130                   |
| CaCl <sub>2</sub> * 4 H <sub>2</sub> O                 |                           |                       |                        |             |                   |                 |             | 0.159               |                        |                         |       |                        |                         |
| CaCl <sub>2</sub> * 2 H <sub>2</sub> O                 | 0.029                     |                       |                        | 0.029       | 0.029             | 0.128           | 0.060       |                     |                        | 0.029                   | 0.765 | 0.128                  |                         |
| NH <sub>4</sub> Cl                                     |                           |                       | 0.536                  |             | 0.535             |                 |             |                     |                        |                         |       |                        |                         |
| H <sub>2</sub> SO <sub>4</sub>                         |                           |                       | 0.196                  |             |                   |                 |             |                     |                        |                         |       |                        |                         |
| Na <sub>2</sub> SO <sub>4</sub> (anhydrous)            | 0.079                     | 0.039                 |                        | 0.079       | 0.071             | 0.040           | 0.080       |                     | 0.039                  | 0.071                   |       | 0.039                  | 0.052                   |
| Na <sub>2</sub> SO <sub>4</sub> * 10 H <sub>2</sub> O  |                           |                       |                        |             |                   |                 |             | 0.090               |                        |                         |       |                        |                         |
| Na <sub>2</sub> HPO <sub>4</sub>                       | 0.148                     |                       |                        | 0.148       | 0.171             | 0.074           | 0.148       | 0.074               |                        | 0.142                   |       | 0.071                  |                         |
| Na <sub>2</sub> HPO <sub>4</sub> * 12 H <sub>2</sub> O | -                         | 0.179                 |                        |             |                   |                 |             |                     |                        |                         |       |                        |                         |
| Na <sub>2</sub> HPO <sub>4</sub> * 7 H <sub>2</sub> O  |                           |                       |                        |             |                   |                 |             |                     | 0.179                  |                         |       |                        | 0.240                   |
| NaH <sub>2</sub> PO <sub>4</sub>                       |                           |                       | 0.141                  |             |                   |                 |             |                     |                        |                         |       |                        |                         |
| NaHCO <sub>3</sub>                                     | 1.950                     |                       | 2.268                  | 1.950       |                   |                 | 1.900       |                     |                        |                         |       |                        |                         |
| NaCH <sub>3</sub> CO <sub>2</sub> * 3 H <sub>2</sub> O |                           |                       |                        |             | 0.954             |                 |             |                     |                        |                         |       |                        |                         |
| Na <sub>2</sub> -tartrate * 2 H <sub>2</sub> O         | 0.180                     | 0.090                 |                        | 0.18        |                   | 0.090           | 0.180       | 0.090               | 0.090                  |                         |       | 0.090                  | 0.120                   |
| Citric acid                                            |                           | 20.800                |                        |             |                   |                 |             |                     | 20.800                 |                         |       | 20.800                 | 28.000                  |
| Citric acid * H <sub>2</sub> O                         |                           |                       |                        |             |                   | 5.424           |             |                     | 0.128                  |                         |       |                        |                         |
| Na <sub>3</sub> -citrate                               |                           |                       | 0.051                  |             |                   |                 |             |                     |                        |                         |       |                        |                         |
| Na <sub>3</sub> -citrate * 2 H <sub>2</sub> O          | 0.152                     | 0.077                 |                        | 0.152       | 0.059             | 0.076           | 0.152       | 5.313               | 0.077                  |                         |       | 0.077                  | 0.102                   |
| 90% lactic acid                                        | 0.156                     |                       |                        | 0.14        |                   | 0.079           | 0.056       |                     |                        |                         |       |                        |                         |
| Na-lactate                                             |                           | 0.085                 |                        |             |                   |                 |             | 0.088               | 0.085                  |                         |       | 0.085                  | 0.220                   |
| Glycine                                                | 0.118                     | 0.059                 | 0.454                  | 0.118       | 0.45              | 0.059           | 0.118       | 0.059               |                        | 0.450                   | 0.450 | 0.059                  |                         |
| Glycerine                                              |                           |                       |                        |             |                   |                 |             |                     | 0.059                  |                         |       |                        | 0.078                   |
| KH-phthalate                                           |                           |                       |                        |             | 2.043             |                 |             |                     |                        | 4.085                   | 4.086 |                        |                         |

|                 | Christensen et al. (1994) | Thélohan & de Meringo | Guldborg et al. (1998) |             |                   |                 |             | Muhle et al. (1998) | Stopford et al. (2003) | Stefaniak et al. (2005) |     | Midander et al. (2007) | Shinohara et al. (2017) |
|-----------------|---------------------------|-----------------------|------------------------|-------------|-------------------|-----------------|-------------|---------------------|------------------------|-------------------------|-----|------------------------|-------------------------|
|                 |                           |                       | A: MK (HCl)            | B: MG (HCl) | C: MK (phthalate) | D: MG (citrate) | E: MG (HCl) |                     |                        | "PSF"                   | B&A |                        |                         |
| Na-pyruvate     | 0.172                     | 0.086                 |                        | 0.172       |                   | 0.086           | 0.172       | 0.086               | 0.086                  |                         |     | 0.086                  | 0.114                   |
| Benzalconium-Cl |                           |                       |                        |             |                   |                 |             |                     |                        | 50 ppm                  |     |                        |                         |
| Formalin        | 1 mL                      | 1 ml/L                |                        |             |                   |                 |             | 1 mL                |                        |                         |     |                        | 3.8                     |
| HCl             | 3.7 mL/L                  |                       | 0.78                   | 750         |                   |                 | 0.881       |                     |                        |                         |     |                        |                         |

Abbreviations to Table 2: B&A: Baron and Ahmed solution of leukocyte intracellular fluid; MG: Modified Gamble's solution; MK: Modified Kanapilly; PSF: Phagolysosomal simulant fluid.

**Table SI\_2:** Physico-chemical characteristics of TiO<sub>2</sub>, ZnO, SiO<sub>2</sub>, BaSO<sub>4</sub> and CeO<sub>2</sub> ENMs. Characterisation techniques are abbreviated, in order of appearance, as follows: CAS: Chemical Abstracts Service, XRD: X-Ray Diffraction, XRF: X-Ray Fluorescence, TEM: Transmission Electron Microscopy, BET: Brunauer–Emmett–Teller, XPS: X-Ray Photoelectron Spectroscopy, FRAS: Ferric Reduction Ability of Serum, EPR: Electron Paramagnetic Resonance Spectroscopy, DMPO: 5,5-Dimethyl-1-pyrroline-N-oxide, CPH: 1-hydroxy-3-carboxy-pyrrolidine and REACH: Registration, Evaluation, Authorisation and Restriction of Chemicals. This table is equally used by Llewellyn et al (2021)<sup>3</sup>. (Adapted with permission from Llewellyn, S. V.; Conway, G. E.; Zanoni, I.; Jørgensen, A. K.; Shah, U. K.; Seleci, D. A.; Keller, J. G.; Kim, J. W.; Wohlleben, W.; Jensen, K. A.; Costa, A.; Jenkins, G. J. S.; Clift, M. J. D.; Doak, S. H. Understanding the Impact of More Realistic Low-Dose, Prolonged Engineered Nanomaterial Exposure on Genotoxicity Using 3D Models of the Human Liver. J. Nanobiotechnology 2021, 19 (1), 1–24. Copyright 2021 BioMed Central.)

| <b>ENM Physico-Chemical Characterisation</b> | <b>TiO<sub>2</sub><br/>NM-105</b>  | <b>ZnO<br/>NM-111</b>                                                                                            | <b>SiO<sub>2</sub><br/>NM-200</b>                                                                                                                                                                                    | <b>BaSO<sub>4</sub><br/>NM-220</b>                                 | <b>CeO<sub>2</sub><br/>NM-212</b>                                                                                                                                                         |
|----------------------------------------------|------------------------------------|------------------------------------------------------------------------------------------------------------------|----------------------------------------------------------------------------------------------------------------------------------------------------------------------------------------------------------------------|--------------------------------------------------------------------|-------------------------------------------------------------------------------------------------------------------------------------------------------------------------------------------|
| <i>Core Composition &amp; CAS</i>            | Titanium Dioxide<br>CAS: 1317-80-2 | Zinc Oxide<br>CAS: 1314-13-2                                                                                     | Silicon Dioxide<br>CAS: 7631-86-9                                                                                                                                                                                    | Barium Sulfate<br>CAS: 7727-43-7                                   | Cerium Dioxide<br>CAS: 1306-38-3                                                                                                                                                          |
| <i>Crystalline Phases (XRD)</i>              | 86.9% Anatase +<br>13.1% Rutile    | Zincite                                                                                                          | Amorphous SiO <sub>2</sub>                                                                                                                                                                                           | Barite                                                             | Cerianite                                                                                                                                                                                 |
| <i>Surface Coating</i>                       | N/A                                | Triethoxycaprylsilane                                                                                            | N/A                                                                                                                                                                                                                  | N/A                                                                | N/A                                                                                                                                                                                       |
| <i>Impurities (XRF)</i>                      | None<br>(Purity >99%)              | P <sub>2</sub> O <sub>5</sub> , SiO <sub>2</sub> , CaO, CuO,<br>Fe <sub>2</sub> O <sub>3</sub> , NiO (All <1.0%) | SO <sub>3</sub> , Na <sub>2</sub> O (>1%);<br>Cl, Al <sub>2</sub> O <sub>3</sub> (<1%);<br>CaO, TiO <sub>2</sub> , Fe <sub>2</sub> O <sub>3</sub> , K <sub>2</sub> O,<br>CuO, NiO, ZrO <sub>2</sub> , ZnO<br>(<0.1%) | Na, Ca, Sr, F, Cl,<br>Organic<br>Contaminations<br>(Purity >93.8%) | P <sub>2</sub> O <sub>5</sub> , CaO, Cl (<1.0%)<br>V <sub>2</sub> O <sub>5</sub> , SO <sub>3</sub> , CoO, MgO,<br>SiO <sub>2</sub> , CuO, Fe <sub>2</sub> O <sub>3</sub> , ZnO<br>(<0.1%) |
| <i>Size (MinFerret; TEM)</i>                 | 25 nm                              | 40.6 ± 26.1 nm                                                                                                   | 35.5 ± 38.9 nm                                                                                                                                                                                                       | 31.5 ± 15.9 nm                                                     | 13.7 ± 7.6 nm                                                                                                                                                                             |
| <i>3D Aspect Ratio and Circulatory (TEM)</i> | N/A                                | A.R: 1.88 ± 0.78<br>C: 0.80 ± 0.12                                                                               | A.R: 1.57 ± 0.35<br>C: 0.41 ± 0.20                                                                                                                                                                                   | A.R: 1.22 ± 0.19<br>C: 0.98 ± 0.04                                 | A.R: 1.21 ± 0.25<br>C: 0.97 ± 0.06                                                                                                                                                        |
| <i>Surface Area (BET)</i>                    | 51.0 m <sup>2</sup> /g             | 12.0 m <sup>2</sup> /g                                                                                           | 166.5 m <sup>2</sup> /g                                                                                                                                                                                              | 33.0 m <sup>2</sup> /g                                             | 27.0 m <sup>2</sup> /g                                                                                                                                                                    |
| <i>Density (He Pycnometer)</i>               | 3.95 g/cm <sup>3</sup>             | 4.99 g/cm <sup>3</sup>                                                                                           | 2.19 g/cm <sup>3</sup>                                                                                                                                                                                               | 4.13 g/cm <sup>3</sup>                                             | 7.2 g/cm <sup>3</sup>                                                                                                                                                                     |
| <i>Chemical Nature of the Surface (XPS)</i>  | Ti: 24.5%<br>O: 65.0%<br>C: 10.5%  | Zn: 34.6%<br>C: 22.2%<br>O: 43.1%                                                                                | C: 4.1%<br>Na: 1.0%<br>O: 70.8%<br>S: 0.06%<br>Si: 24.1%                                                                                                                                                             | Ba: 21.5%<br>S: 12.5%<br>O: 65.8%                                  | Ce: 25.6%<br>O: 74.4%                                                                                                                                                                     |

|                                                                           |                   |                    |                    |                    |                   |
|---------------------------------------------------------------------------|-------------------|--------------------|--------------------|--------------------|-------------------|
| <i>Surface Charge (Zeta Potential at pH 7 in 10mM KCl Water Solution)</i> | -17.0 mv          | N/A                | -22.0 mV           | -30.2 mV           | +35.2 mV          |
| <i>Hydrophobicity (Water Contact Angle)</i>                               | Hydrophilic (60°) | Hydrophobic (152°) | Hydrophilic (<10°) | Hydrophilic (<10°) | Hydrophilic (60°) |

## Evaluation of dissolution rates from raw ion data

The time-resolved concentrations in the sampled eluates  $c_i$  and the fluid volume flow  $V_i$  of each sampling with duration  $\Delta t_i$  are evaluated towards the dissolved mass  $M_{diss,i}$  in this sampling by correcting for the stoichiometry (Figure SI\_1):

$$M_{diss,i} = \frac{m(ENM)}{m(ion)} c_i(ion) V_i \Delta t_i$$

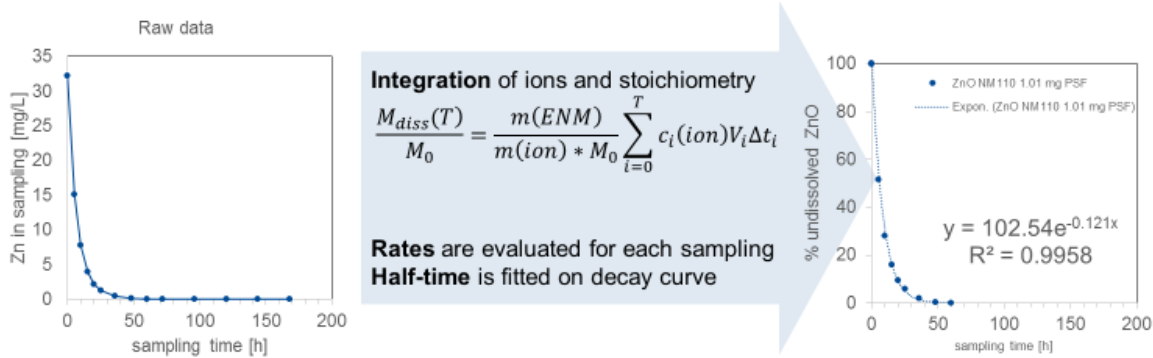

**Figure SI\_1:** summary of calculations that are applied in the manuscript.

All dissolved mass is summed up to construct the dissolved mass fraction  $M_{diss}(t)/M_0$ , and the surface area at the  $i^{th}$  sampling  $SA_i(t)$ . Instantaneous dissolution rates are constructed for each sampling as:  $k_i = M_{diss,i} / SA_i / \Delta t_i$ . For slowly dissolving materials, the change of SA over time is often negligible, but for partially or quickly dissolving materials, an assumption on geometry needs to be made: ISO guidance and Utembe *et al.* 2015 recommend to model the loss of solids as the shrinkage of spheres<sup>4,5</sup>, such that the lost mass is modeled by reduced diameter:  $SA(t) = BET(t=0) * [(M_0 - M_{diss}(t))/M_0]^{2/3}$ . Finally, one can evaluate the dissolution results in two approaches:

- The dissolution kinetics  $1 - M_{diss}(t)/M_0$  can be fitted by an exponential decay to obtain the *half-time*. The half-time is a descriptor of dissolution in mass metrics with conventional unit of days.
- The *average dissolution rate*  $k$  is obtained by averaging the instantaneous rates, and is a descriptor of dissolution in surface metrics with conventional unit  $ng/cm^2/h$ . Because of the uncertainties in the development of the specific surface area, only the  $k_i$  values from samplings with  $M_{diss}(T) / M_0$  below 90% (i.e. more than 10% of solid mass remain) were used to calculate the average. The 10% rule has been justified by comparisons between various parameter setting<sup>6</sup>.

The consistency between the two approaches can be checked by conversion from rate to a *calculated* half-time by  $T_{\frac{1}{2}} = \frac{\ln 2}{k * BET}$ , as is well-established<sup>4</sup>.

**Table SI\_3:** Results of particle size analysis by TEM. This data is represented in Fig.4. # particles analyzed is the total number of particles which were identified and measured for each sample.

|                                             | <b>Pristine ENM</b> | <b>Medium C: MK (phthalate)</b> | <b>Medium D: MG (citrate)</b> | <b>Medium E: MG (HCl)</b> | <b>Medium Muhle</b> | <b>Medium Midander</b> |
|---------------------------------------------|---------------------|---------------------------------|-------------------------------|---------------------------|---------------------|------------------------|
| <b>TiO<sub>2</sub> median</b>               | 23                  | 19                              | 23                            | 20                        | 20                  | 22                     |
| <b>TiO<sub>2</sub> min</b>                  | 10                  | 7                               | 10                            | 9                         | 8                   | 11                     |
| <b>TiO<sub>2</sub> max</b>                  | 120                 | 56                              | 114                           | 70                        | 63                  | 69                     |
| <b>TiO<sub>2</sub> #particles analyzed</b>  | 420                 | 189                             | 183                           | 208                       | 195                 | 197                    |
| <b>CeO<sub>2</sub> median</b>               | 17                  | 25                              | 24                            | 24                        | 25                  | 23                     |
| <b>CeO<sub>2</sub> min</b>                  | 4                   | 8                               | 8                             | 7                         | 8                   | 7                      |
| <b>CeO<sub>2</sub> max</b>                  | 157                 | 148                             | 93                            | 110                       | 110                 | 110                    |
| <b>CeO<sub>2</sub> #particles analyzed</b>  | 171                 | 231                             | 221                           | 191                       | 200                 | 316                    |
| <b>SiO<sub>2</sub> median</b>               | 12                  | 17                              | 17                            | 16                        | 16                  | 16                     |
| <b>SiO<sub>2</sub> min</b>                  | 5                   | 7                               | 8                             | 8                         | 8                   | 8                      |
| <b>SiO<sub>2</sub> max</b>                  | 34                  | 34                              | 32                            | 35                        | 35                  | 34                     |
| <b>SiO<sub>2</sub> #particles analyzed</b>  | 154                 | 150                             | 160                           | 158                       | 157                 | 806                    |
| <b>BaSO<sub>4</sub> median</b>              | 18                  | 23                              | 21                            | 25                        | 28                  | 22                     |
| <b>BaSO<sub>4</sub> min</b>                 | 4                   | 11                              | 11                            | 12                        | 13                  | 10                     |
| <b>BaSO<sub>4</sub> max</b>                 | 71                  | 40                              | 36                            | 36                        | 39                  | 28                     |
| <b>BaSO<sub>4</sub> #particles analyzed</b> | 548                 | 794                             | 898                           | 712                       | 890                 | 1508                   |



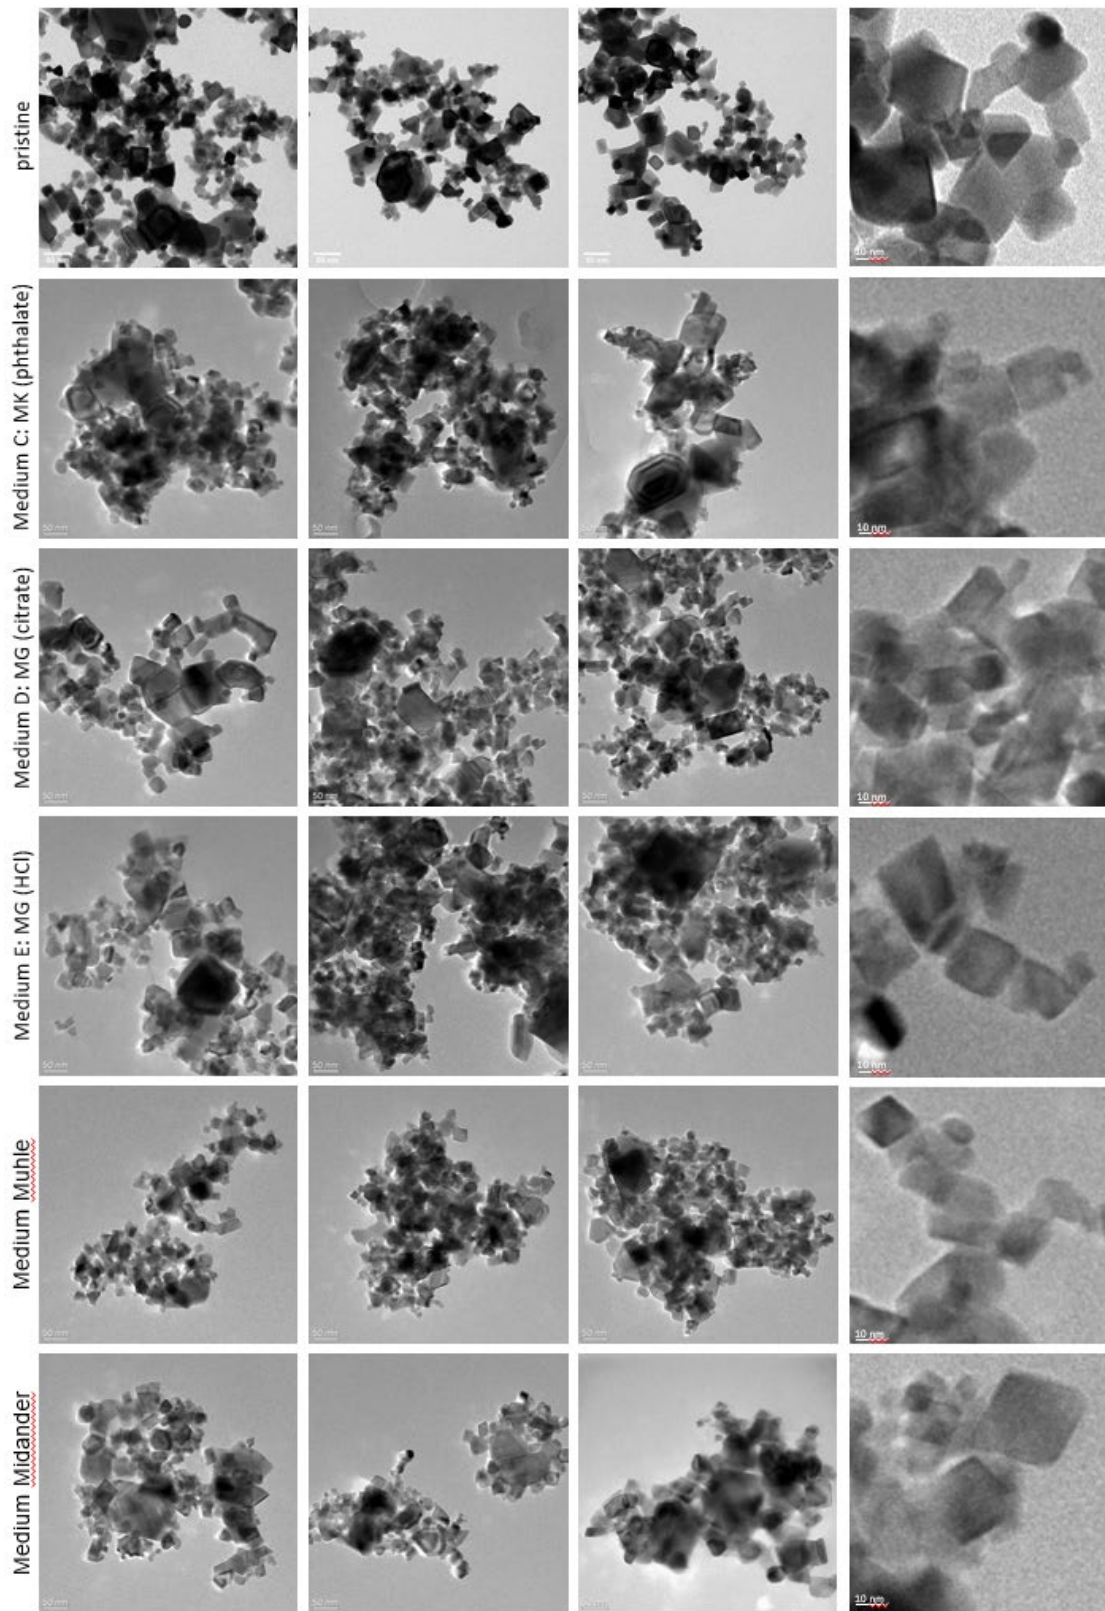

**Figure SI\_2:** TEM re-analysis of CeO<sub>2</sub> NM-212 pristine and after 7 days of dissolution testing. For each medium, three spots on the TEM grid were imaged and evaluated.

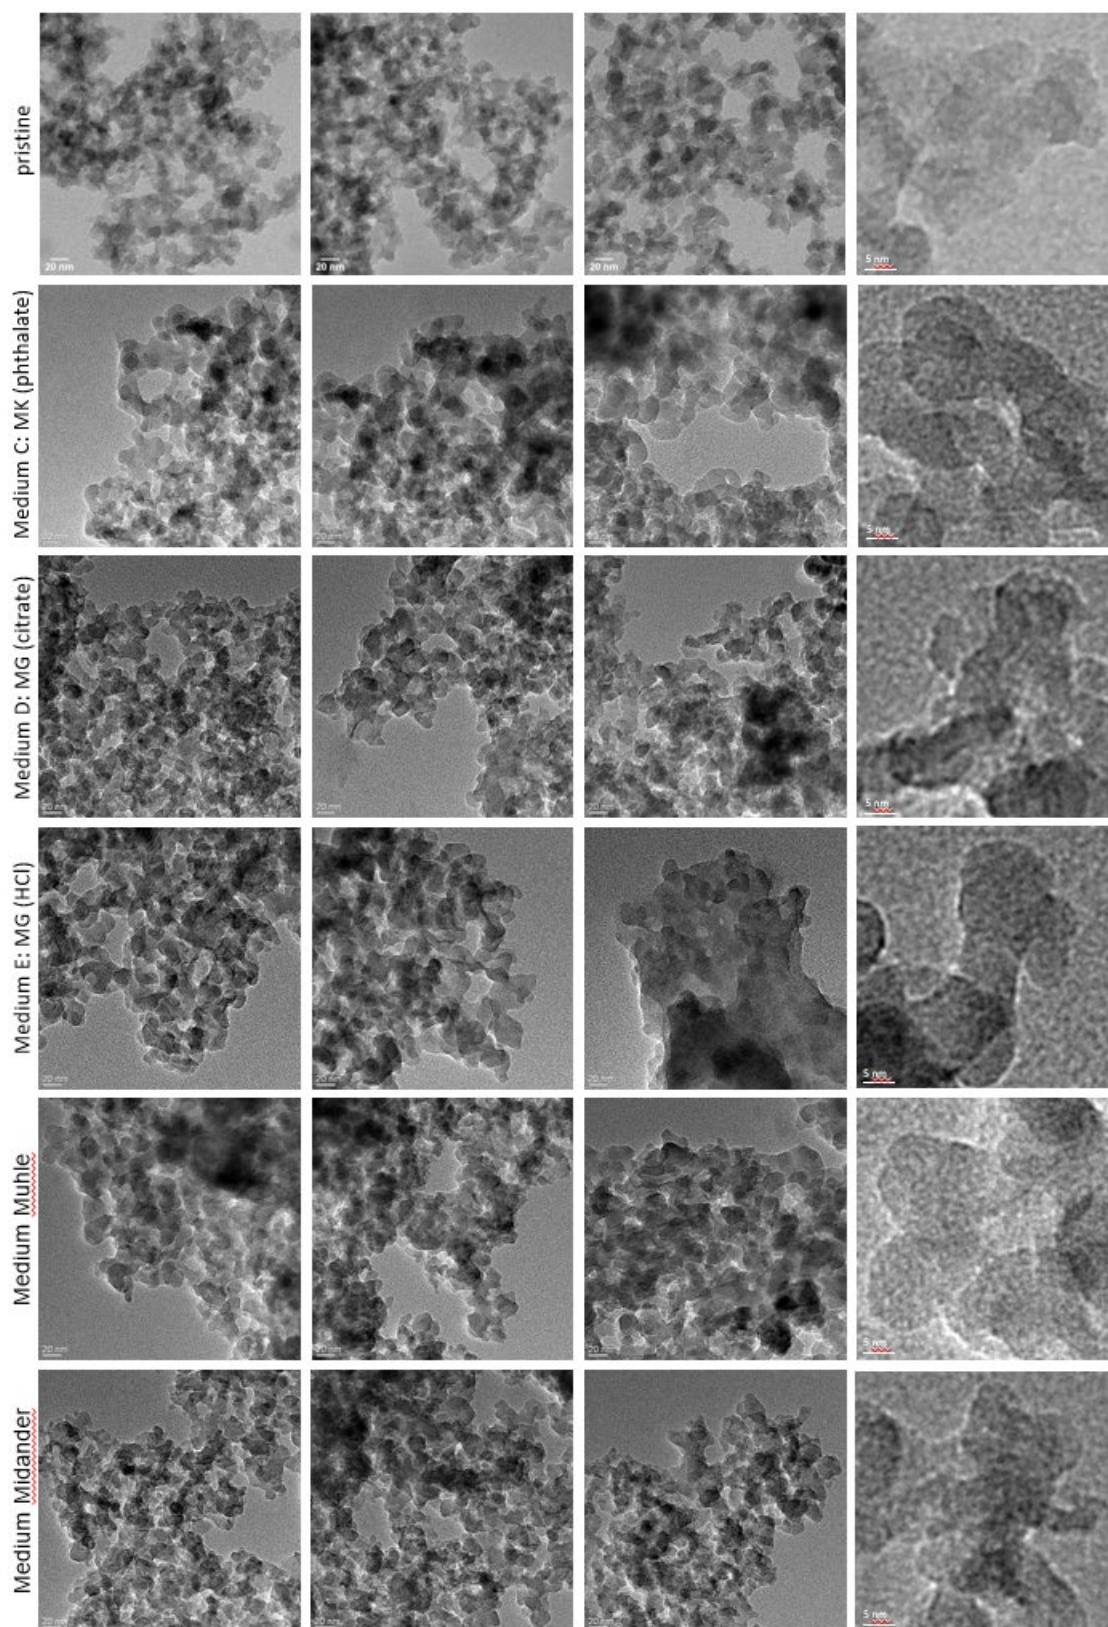

**Figure SI\_3:** TEM re-analysis of SiO<sub>2</sub> NM-200 pristine and after 7 days of dissolution testing. For each medium, three spots on the TEM grid were imaged and evaluated.

## References in the Supporting Information:

- (1) PubMed.com.
- (2) Sauer, U. G.; Werle, K.; Waindok, H.; Hirth, S.; Hachmöller, O.; Wohlleben, W. Critical Choices in Predicting Stone Wool Biodurability: Lysosomal Fluid Compositions and Binder Effects. *Chem. Res. Toxicol.* **2021**. <https://doi.org/10.1021/acs.chemrestox.0c00401>.
- (3) Llewellyn, S. V.; Conway, G. E.; Zanoni, I.; Jørgensen, A. K.; Shah, U. K.; Seleci, D. A.; Keller, J. G.; Kim, J. W.; Wohlleben, W.; Jensen, K. A.; Costa, A.; Jenkins, G. J. S.; Clift, M. J. D.; Doak, S. H. Understanding the Impact of More Realistic Low-Dose, Prolonged Engineered Nanomaterial Exposure on Genotoxicity Using 3D Models of the Human Liver. *J. Nanobiotechnology* **2021**, *19* (1), 1–24. <https://doi.org/10.1186/s12951-021-00938-w>.
- (4) Utembe, W.; Potgieter, K.; Stefaniak, A. B.; Gulumian, M. Dissolution and Biodurability: Important Parameters Needed for Risk Assessment of Nanomaterials. *Part. Fibre Toxicol.* **2015**, *12* (1), 11. <https://doi.org/10.1186/s12989-015-0088-2>.
- (5) *ISO/TR 19057:2017 Nanotechnologies — Use and Application of Acellular in Vitro Tests and Methodologies to Assess Nanomaterial Biodurability*; 2017.
- (6) Keller, J. G.; Peijnenburg, W.; Werle, K.; Landsiedel, R.; Wohlleben, W. Understanding Dissolution Rates via Continuous Flow Systems with Physiologically Relevant Metal Ion Saturation in Lysosome. *Nanomaterials* **2020**, *10* (2), 1–16. <https://doi.org/10.3390/nano10020311>.
